# Supplementary material for: Comparative genomic analysis reveals high intra-serovar plasticity within Salmonella Napoli isolated in 2005–2017
Source: PubMed Central journal article supplement (PMC7057659; doi:10.1186/s12864-020-6588-y), 2020-03-04
Supplement: 12864_2020_6588_MOESM6_ESM.pdf [file 12864_2020_6588_MOESM6_ESM.pdf]

GCF\_00048672/2  
GCF\_00104539v1  
GCF\_00002656v1\_ASM104539v1  
GCF\_00001188v1\_ASM1188v1  
GCF\_00023861v1\_ASM23861v1  
GCF\_00081807v1\_ASM81807v1  
GCF\_00081811v1\_ASM81811v1

046087  
176319  
16-174547\_S2  
16-174546\_S19  
16-174518\_S31  
16-174522\_S33  
16-174537\_S30  
5225  
31654  
17-33354\_S9  
16-174539\_S3  
16-174535\_S1  
16-174466\_S14  
16-174516\_S24  
16-174508\_S29  
16-174519\_S25  
9642015\_S20  
16-174536\_S6  
16-174548\_S4  
16-174512\_S30  
16-174477\_S7  
16-174478\_S5  
16-174543\_S34  
ERS197925  
16-174520\_S32  
16-174515\_S19  
9672015\_S23  
16-174546\_S10  
16-174546\_S12  
16-174538\_S2  
16-174505\_S18  
PNUSAS001489  
PNUSAS001666  
PNUSAS001782  
PNUSAS001464  
16-174540\_S31  
1234549\_S12  
ERS197921  
ERS197920  
16-174544\_S35  
170465  
ST-2035  
28062011\_S11  
11-00369\_S30  
1040635\_S29  
DTU2017-706-PRJ1109-Salmonella-Napoli-2012-60-2797-1\_S38  
16-174485\_S22  
16-174489\_S10  
16-174485\_S13  
16-174489\_S24  
20316  
16-174545\_S36  
MS170187  
Salmonella\_Napoli\_233-14  
16-174490\_S25  
MS160065  
16-174472\_S16  
16-174491\_S26  
16-174481\_S8  
DTU2017-704-PRJ1109-Salmonella-Napoli-2006-60-880-1\_S37  
35302011\_S15  
16-174493\_S12  
H123900699  
16-174475\_S19  
2302  
ERS197924  
ERS197923  
ERS197922  
ERS197921  
H123900650  
3530  
DTU2017-706-PRJ1109-Salmonella-Napoli-2013-60-804-1\_S39  
16-174474\_S18  
6360  
16-174489\_S27  
16-174496\_S14  
4205  
ST-2101  
16-174492\_S11  
16-174473\_S17  
16-174487\_S23  
16-174530\_S27  
16-174541\_S32  
ST-2019  
16-174601\_S15  
16-174470\_S6  
16-174471\_S15  
ST-2019  
16-174534\_S29  
3372012\_S8  
9672015\_S23  
9662015\_S22  
16-174503\_S17  
17-33363\_S13  
16-174529\_S26  
17-33377\_S25  
16-174509\_S20  
17-33355\_S11  
16-174533\_S35  
16-174480\_S20  
16-174532\_S28  
9682015\_S24  
9662015\_S21  
16-174511\_S22  
17-33368\_S26  
16-174510\_S16  
17-33361\_S12  
9642015\_S18  
16-174484\_S9  
16-174485\_S21  
17-33346\_S10  
12-113333\_S13  
12-62575\_S14  
12-68383\_S16  
12-25446\_S10  
GCA\_003296145.1\_ASM329614v1  
17-106735\_S22  
17-33390\_S33  
17-32057\_S6  
17-33394\_S2  
13-125482\_S9  
MS170226  
772011\_S9  
148867\_S17  
30132011\_S12  
10402015\_S25  
17-33394\_S14  
1425394\_S18  
1462014\_S27  
2507  
17-33360\_S15  
ERS197916  
DTU2017-703-PRJ1109-Salmonella-Napoli-2006-60-55-4\_S36  
ERS197915  
17-33386\_S31  
17-33388\_S32  
17-33389\_S19  
17-33371\_S20  
17-33367\_S16  
17-33362\_S29  
17-33366\_S17  
17-33398\_S5  
17-33391\_S1  
17-33373\_S21  
12-115216\_S11  
17-33374\_S22  
17-33376\_S24  
17-33375\_S23  
17-33365\_S16  
3022011\_S13  
14-104682\_S19  
33692011\_S14  
1042014\_S26  
17-33365\_S3  
17-33402\_S7  
16-137932\_S20  
25282011\_S10  
17-33379\_S27  
17-33343\_S7  
ERS197917  
38682011\_S16  
17-33391\_S28  
17-33403\_S8  
17-33404\_S9  
17-33386\_S4  
17-33396\_S10  
1052015\_S17  
H131300226  
12-121733\_S8  
12-121737\_S10  
12-121740\_S11  
17-11287\_S32  
12-121726\_S15  
17-11288\_S33  
12-121729\_S7  
12-121736\_S9  
ST-474  
42189  
DTU2017-707-PRJ1109-Salmonella-Napoli-7423188\_S40

GCF\_900205295.1\_E98-3139  
GCF\_0013621352.11909\_3  
GCF\_00246535.1\_ASM24653v1  
GCF\_900205255.1\_1564  
GCF\_001079465.2\_STyphi\_1553\_1  
GCF\_001364865.2\_Ty3\_243  
GCF\_0013621752.ERL1280  
GCF\_001083945.2\_052042\_2  
GCF\_001240685.2\_Ty3\_193  
GCF\_001148305.2.ERL082365  
GCF\_001360955.2.2010\_7898  
GCF\_001157245.2.ERL12148  
GCF\_900185485.1.BL60006  
GCF\_001361075.2\_Ty685  
GCF\_001369015.2.129\_0238  
GCF\_001366455.2\_1018899  
GCF\_001106745.2\_UJ\_2120  
GCF\_000007545.1\_ASM754v1  
GCF\_000385905.1\_ASM38590v1  
GCF\_001362335.2\_Ty2  
GCF\_900205265.1\_lupe\_GEN0069\_5  
GCF\_001136905.2.ERL072973  
GCF\_001118185.2\_H12ESR00394-001A  
GCF\_001168185.2.ERL024919  
GCF\_001362195.2.H12ESR00755-001A  
GCF\_900205275.1\_4031y  
GCF\_001121855.2\_4041y  
GCF\_001163025.2.H12ESR04734-001A  
GCF\_001127455.2.ERL041834  
GCF\_000195995.1\_ASM19599v1  
GCF\_001095885.2.ERL114000  
GCF\_001357955.2.80\_2102  
GCF\_001048035.2.ERL103914  
GCF\_001362095.2\_094151\_4  
GCF\_001302625.1\_ASM130262v1  
GCF\_001148125.2.ERL024120  
GCF\_001048375.2\_M223  
GCF\_001119245.2\_76\_1292  
GCF\_001104165.2.E00-7866  
GCF\_001104885.2\_10349\_1\_89\_2

S. Typhimurium FORC\_015, GCA\_000993725.1\_ASM99372v1

GCA\_00000742815.1\_ASM74281v1  
GCA\_001953035.1\_ASM195303v1  
GCA\_000020825.1\_ASM2082v1  
GCA\_002760965.1\_ASM276096v1  
GCA\_003184425.1\_ASM318442v1  
GCA\_003184325.1\_ASM318432v1  
GCA\_00276115.1\_ASM27611v1  
GCA\_000612325.1\_ASM61232v1  
GCA\_003031995.1\_ASM303199v1  
GCA\_002760915.1\_ASM276091v1  
GCA\_001484025.1\_ASM148402v1  
GCA\_000754375.1\_ASM75437v1  
GCA\_000626275.2\_ASM62627v2  
GCA\_000626315.1\_ASM62631v1  
GCA\_000623315.1\_ASM62331v1  
GCA\_000750335.1\_ASM75033v1  
GCA\_000750215.1\_ASM75021v1  
GCA\_000750375.1\_ASM75037v1  
GCA\_000626195.1\_ASM62619v1  
GCA\_000626235.1\_ASM62623v1  
GCA\_002760935.1\_ASM276093v1  
GCA\_002761035.1\_ASM276103v1  
GCA\_000623335.1\_ASM62333v1  
GCA\_000750395.2\_ASM75039v2  
GCA\_000750415.2\_ASM75041v2  
GCA\_00164045.1\_ASM16404v1  
GCA\_002760375.1\_ASM276037v1  
GCA\_000623365.2\_ASM62336v2  
GCA\_002761155.1\_ASM276115v1  
GCA\_002760995.1\_ASM276099v1  
GCA\_000623355.1\_ASM62335v1  
GCA\_001185215.1\_ASM118521v1  
GCA\_001185245.1\_ASM118524v1  
GCA\_001973275.2\_ASM197327v2  
GCA\_000624395.2\_ASM62439v2  
GCA\_000626295.1\_ASM62629v1  
GCA\_000623375.1\_ASM62337v1  
GCA\_000750255.1\_ASM75025v1  
GCA\_000626255.1\_ASM62625v1  
GCA\_000750475.1\_ASM75047v1  
GCA\_000626215.1\_ASM62621v1  
GCA\_000623295.1\_ASM62329v1  
GCA\_000750495.1\_ASM75049v1  
GCA\_000623275.1\_ASM62327v1  
GCA\_000750455.1\_ASM75045v1  
GCA\_000623355.1\_ASM62335v1  
GCA\_000623375.1\_ASM62337v1  
GCA\_000623055.2\_ASM62305v2  
GCA\_000623365.1\_ASM62336v1  
GCA\_000623195.2\_ASM62319v2  
GCA\_002761075.1\_ASM276107v1  
GCA\_002761035.2\_ASM276103v2  
GCA\_000750295.1\_ASM75029v1  
GCA\_002761135.1\_ASM276113v1  
GCA\_000624175.2\_ASM62417v2  
GCA\_000623715.2\_ASM62371v2  
GCA\_002982095.1\_ASM298209v1  
GCA\_000335875.2\_ASM33587v2  
GCA\_000624055.2\_ASM62405v2  
GCA\_000624065.2\_ASM62406v2  
GCA\_000623475.2\_ASM62347v2  
GCA\_00008505.1\_ASM8505v1  
GCA\_000623195.2\_ASM62319v2  
GCA\_000623055.2\_ASM62305v2  
GCA\_000623152.1\_ASM62315v2  
GCA\_000623395.2\_ASM62339v2  
GCA\_000623735.2\_ASM62373v2  
GCA\_000623115.2\_ASM62311v2  
GCA\_000623675.2\_ASM62367v2  
GCA\_000623655.2\_ASM62365v2  
GCA\_002220345.1\_ASM222034v1  
GCA\_002813995.1\_ASM281399v1  
GCA\_001305235.1\_ASM130523v1  
GCA\_002813975.1\_ASM281397v1  
GCA\_000623555.2\_ASM62355v2  
GCA\_003032035.1\_ASM303203v1  
GCA\_002761035.1\_ASM276103v1  
GCA\_002761015.1\_ASM276101v1  
GCA\_002763415.1\_ASM276341v1  
GCA\_001890165.1\_ASM189016v1  
GCA\_000271895.2\_ASM27189v2  
GCA\_000271905.2\_ASM27190v2  
GCA\_000940395.2\_ASM94039v2

S. Typhimurium FORC\_020, GCA\_001454965.1\_ASM145496v1  
GCA\_000272715.4\_ASM27271v4  
GCA\_00016045.1\_ASM1604v1  
GCA\_000272755.4\_ASM27275v4  
GCA\_000442415.1\_ASM44241v1  
GCA\_001922165.1\_ASM192216v1  
GCA\_000272835.4\_ASM27283v4  
GCA\_001278315.1\_ASM127831v1  
GCA\_000272895.3\_ASM27289v3  
GCA\_000272775.4\_ASM27277v4  
GCA\_001278295.1\_ASM127829v1  
GCA\_001890185.1\_ASM189018v1  
GCA\_000272815.2\_ASM27281v2  
GCA\_000483715.2\_ASM48371v2  
GCA\_000272795.2\_ASM27279v2

Newport  
S. Newport CFSAN003387, GCA\_001454965.1\_ASM145496v1  
S. Cheloneaeus str:ATCC 10708, GCA\_000487295.2\_ASM48729v2  
GCA\_00020705.1\_ASM20705v1  
GCA\_001441245.1\_ASM144124v1  
GCA\_000430105.1\_ASM43010v1  
GCA\_000258365.1\_ASM25836v1  
GCA\_001692635.1\_ASM169263v1  
GCA\_000430085.2\_ASM43008v2  
GCA\_0006505705.1\_ASM650570v1  
GCA\_001690115.1\_ASM169011v1  
GCA\_001689935.1\_ASM168993v1  
GCA\_001690005.1\_ASM169000v1  
GCA\_001441225.1\_ASM144122v1  
GCA\_001690095.1\_ASM169009v1  
GCA\_001692555.1\_ASM169255v1  
GCA\_001692495.1\_ASM169249v1  
GCA\_001692575.1\_ASM169257v1  
GCA\_001692595.1\_ASM169259v1  
GCA\_001692615.1\_ASM169261v1  
GCA\_001692515.1\_ASM169251v1  
GCA\_001441205.1\_ASM144120v1  
GCA\_001690055.1\_ASM169005v1  
GCA\_001690075.1\_ASM169007v1  
GCA\_001690135.1\_ASM169013v1  
GCA\_001690035.1\_ASM169003v1  
GCA\_001692655.1\_ASM169265v1  
GCA\_000486045.2\_ASM48604v2

S. Heidelberg  
GCA\_000743055.1\_ASM74305v1  
GCA\_000483535.2\_DT2  
GCA\_000213635.1\_ASM21363v1  
GCA\_000430165.1\_ASM43016v1  
GCA\_00129225.1\_ASM12922v1  
GCA\_003032015.1\_ASM303201v1  
GCA\_002947135.1\_ASM294713v1  
GCA\_001705365.1\_ASM170536v1  
GCA\_000715155.2\_ASM71515v2  
GCA\_000322165.1\_ASM32216v1  
GCA\_001623745.2\_ASM162374v2  
GCA\_000826935.1\_ASM82693v1  
GCA\_003194225.1\_ASM319422v1  
GCA\_00027025.1\_ASM27025v1  
GCA\_900184385.1\_STM12LJK  
GCA\_001577505.1\_ASM157750v1  
GCA\_001576275.1\_ASM157627v1  
GCA\_000941015.2\_ASM94101v2  
GCA\_000188695.1\_ASM188695v1  
GCA\_000486345.2\_ASM48634v2  
GCA\_001922185.1\_ASM192218v1  
GCA\_002209225.2\_ASM220922v2  
GCA\_000188735.1\_ASM18873v1  
GCA\_000210855.2\_ASM21085v2  
GCA\_000252875.1\_ASM25287v1  
GCA\_001623705.1\_ASM162370v1  
GCA\_000973645.1\_ASM97364v1  
GCA\_00087015.1\_ASM87015v1  
GCA\_002009155.1\_ASM200915v1  
GCA\_000283735.1\_ASM28373v1  
GCA\_000380325.1\_ASM38032v1  
GCA\_00038035.1\_ASM38035v1  
GCA\_000006945.2\_ASM694v2  
GCA\_001623765.1\_ASM162376v2  
GCA\_001623685.1\_ASM162368v1  
GCA\_001623825.2\_ASM162382v2  
GCA\_001623725.1\_ASM162372v1  
GCA\_001623805.1\_ASM162380v1  
GCA\_001576255.1\_ASM157625v1  
GCA\_002761055.1\_ASM276105v1  
GCA\_000636135.1\_ASM63613v1  
GCA\_000493675.1\_DT104  
GCA\_001617585.1\_ASM161758v1  
GCA\_001623775.1\_ASM162377v1  
GCA\_001623845.1\_ASM162384v1  
GCA\_001989635.1\_ASM198963v1  
GCA\_002313125.1\_ASM231312v1  
GCA\_900168885.1\_30674\_D01  
GCA\_001540845.1\_304636\_09  
GCA\_00221025.1\_ASM22102v1  
GCA\_001236325.1\_ASM123632v1  
GCA\_001623645.2\_ASM162364v2  
GCA\_000430145.3\_ASM43014v3

S. Typhimurium  
S. Typhimurium
