# Supplementary material for: Comparative genomic analysis reveals high intra-serovar plasticity within Salmonella Napoli isolated in 2005–2017
Source: PubMed Central journal article supplement (PMC7057659; doi:10.1186/s12864-020-6588-y), 2020-03-04

**A**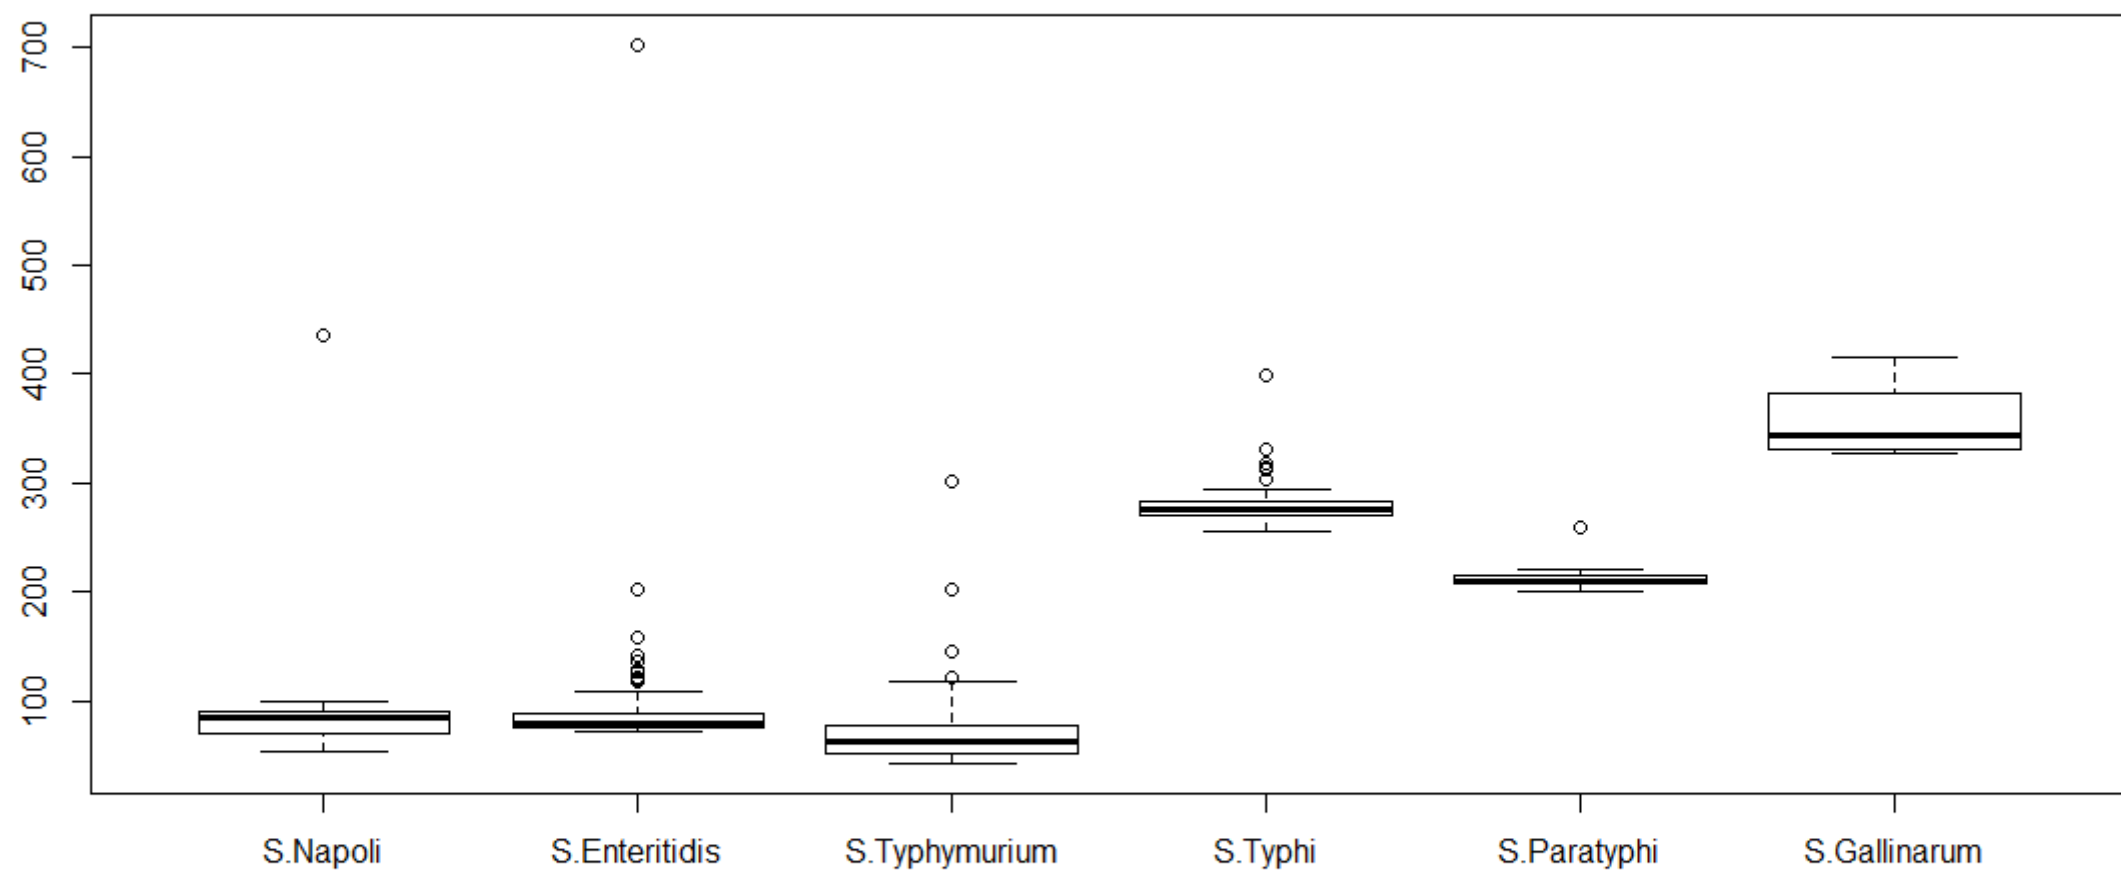**B**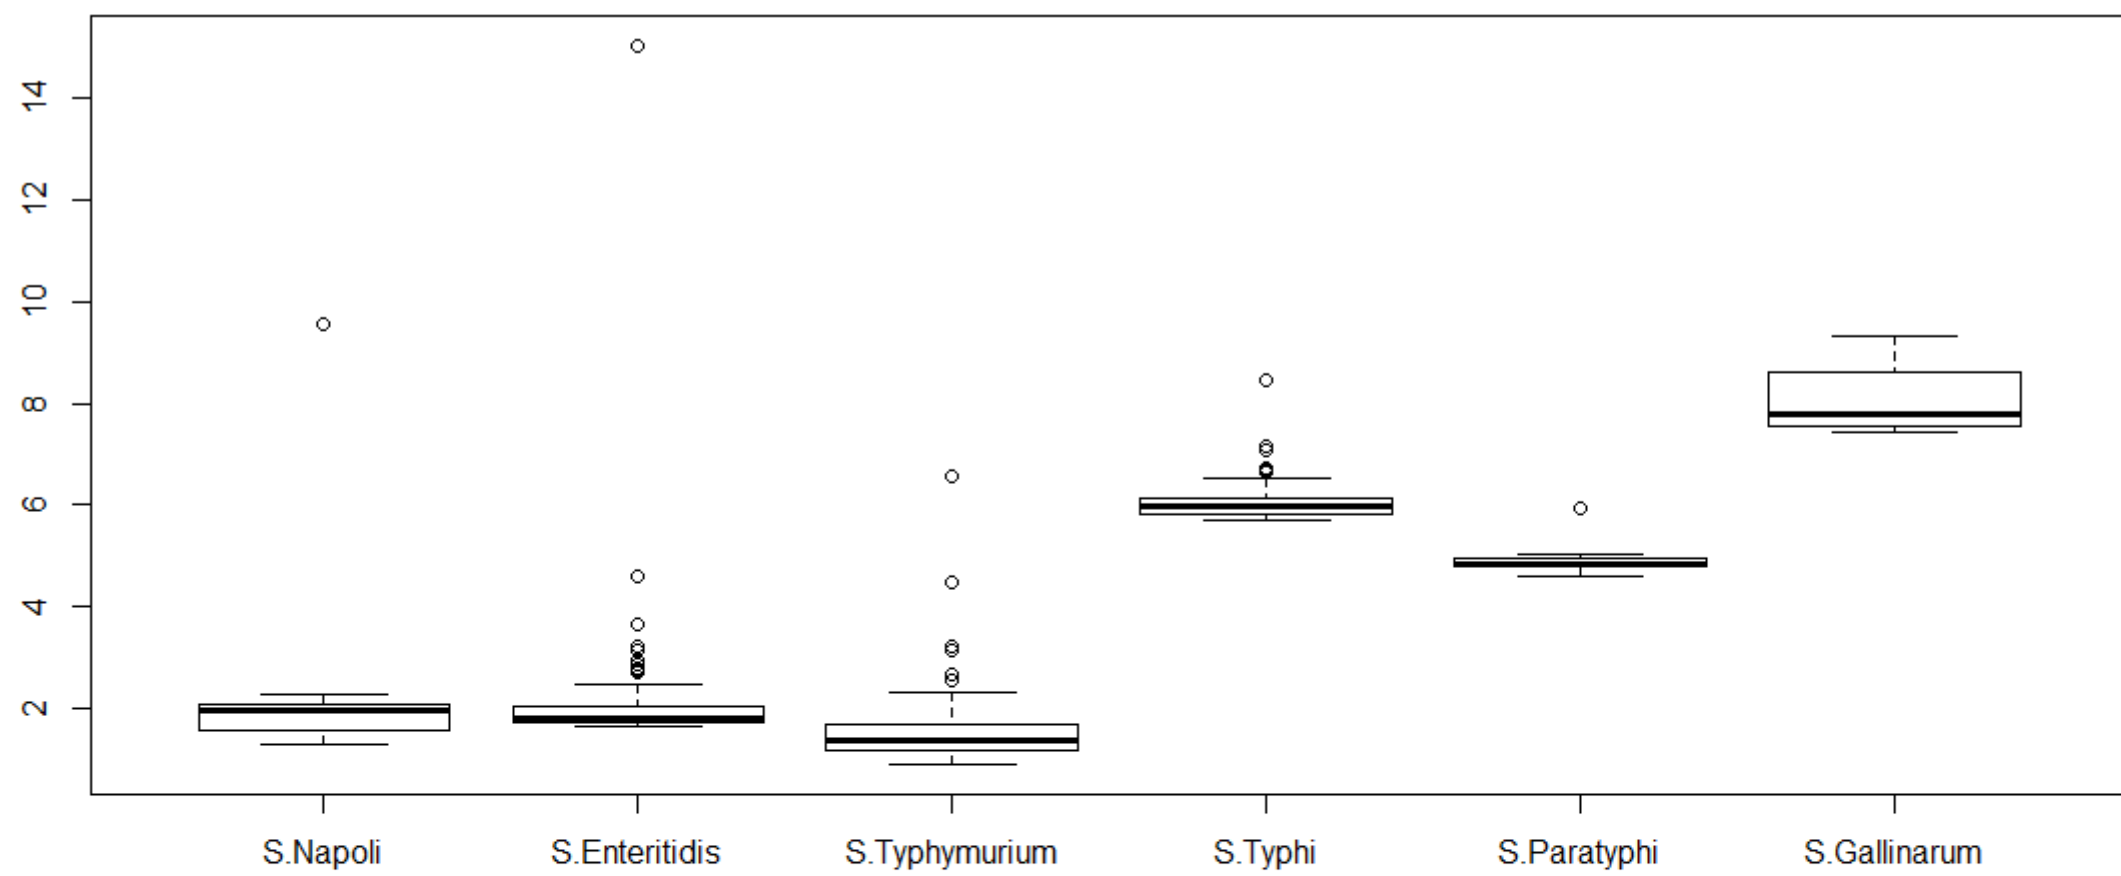

Supplement: 12864_2020_6588_MOESM14_ESM.pdf [file 12864_2020_6588_MOESM14_ESM.pdf]
