# Supplementary material for: Comparative genomic analysis reveals high intra-serovar plasticity within Salmonella Napoli isolated in 2005–2017
Source: PubMed Central journal article supplement (PMC7057659; doi:10.1186/s12864-020-6588-y), 2020-03-04

- S. 4, [5], 12: i:-
- S.cholerasuis
- S.Dublin
- S.enteritidis
- S.Heidelberg
- S.Napoli
- S.Newport
- S.Paratyphi A
- S.Typhi
- S.Typhimurium

- Detected
- Not Detected

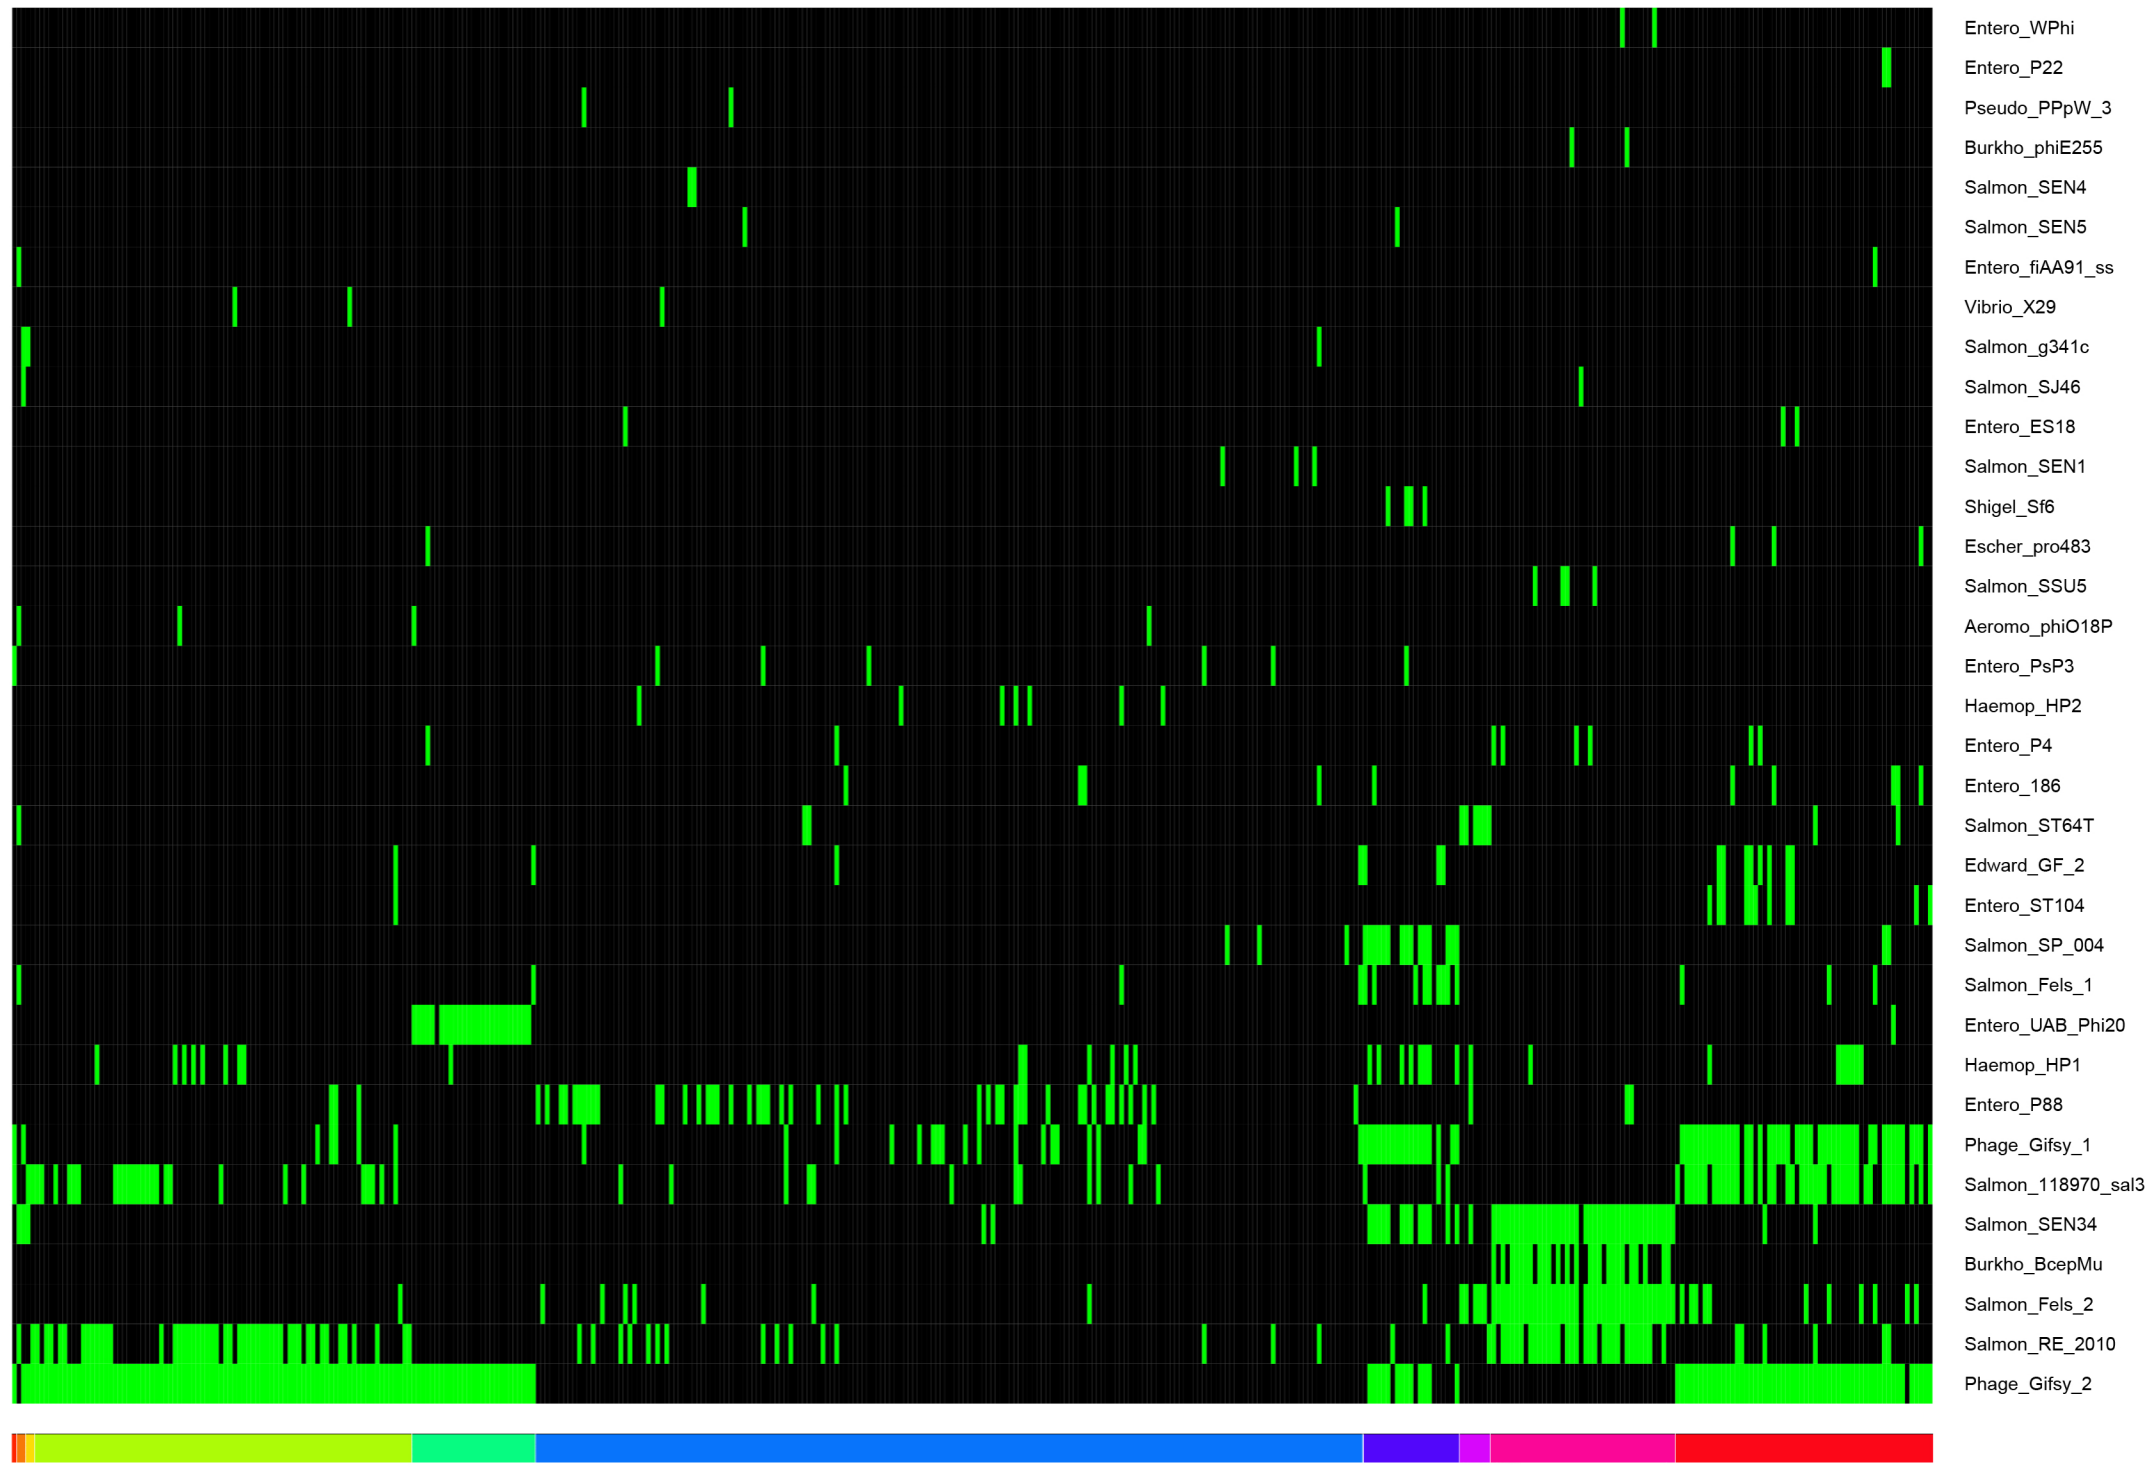

Supplement: 12864_2020_6588_MOESM16_ESM.pdf [file 12864_2020_6588_MOESM16_ESM.pdf]
